# Supplementary material for: Deep Learning-based Assessment of Internal Carotid Artery Anatomy to Predict Difficult Intracranial Access in Endovascular Recanalization of Acute Ischemic Stroke
Source: Springer Nature journal article supplement (doi:10.1007/s00062-023-01276-0), 2023-03-16
Supplement: MOESM1 [file 24631212]

# SUPPLEMENTAL MATERIAL

## Supplemental Figures

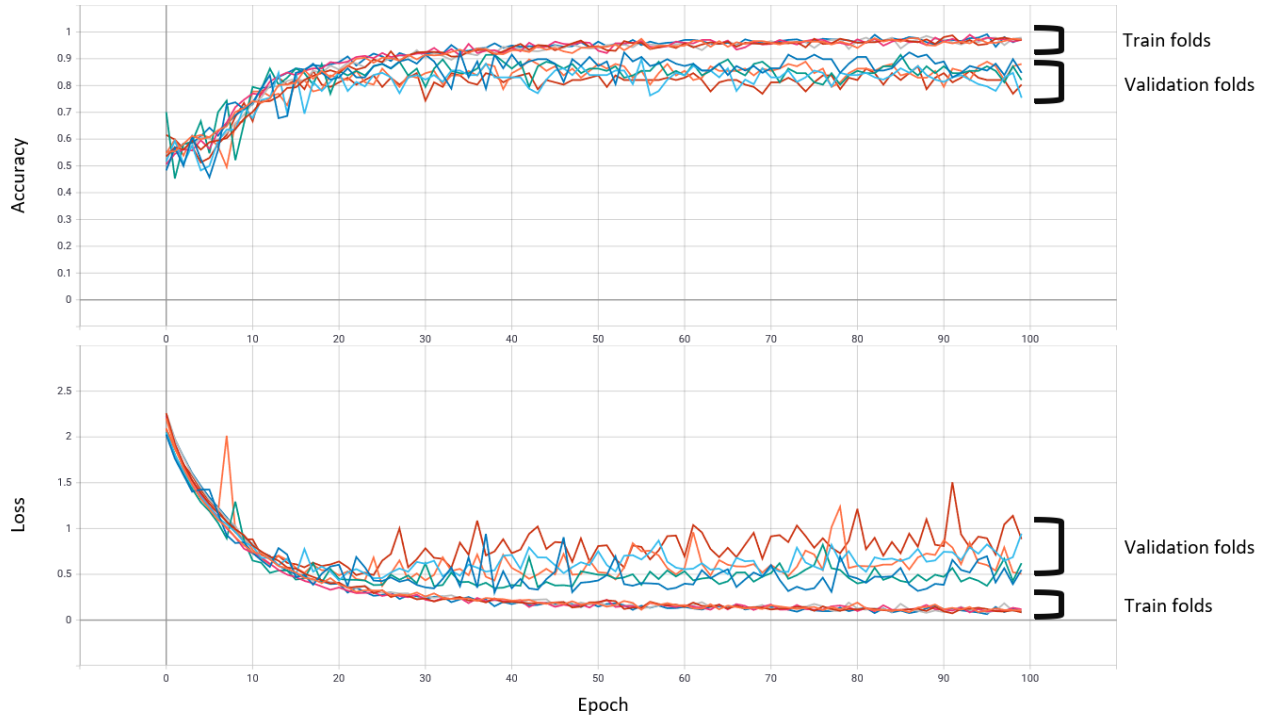

Figure S1: Training progresses of the 5 models generated during cross-validation.
